# Supplementary material for: Association of walking pace and handgrip strength with all-cause, cardiovascular, and cancer mortality: a UK Biobank observational study
Source: PubMed Central journal article supplement — Eur Heart J. 2017 Aug 21;38(43):3232–40. doi: 10.1093/eurheartj/ehx449 (PMC5837337; doi:10.1093/eurheartj/ehx449), 2017-08-21
Supplement: supplementary_material_ehx449.pdf [file supplementary_material_ehx449.pdf]

# Association of walking pace and handgrip strength with all-cause, cardiovascular and cancer mortality: A UK Biobank observational study

Thomas Yates, PhD, Francesco Zaccardi, MD, Nafeesa N Dhalwani, PhD, Melanie Davies, MD, Kishan Bakrania, MSc, Carlos Celis-Morales, PhD, Jason M R Gill, PhD, Paul W Franks, PhD, Kamlesh Khunti, PhD

## Supplementary Material

**Table S1:** Hazard ratios of walking pace with all-cause, cancer, and cardiovascular mortality

**Table S2:** Hazard ratios of handgrip strength with all-cause, cancer, and cardiovascular mortality

**Figure S1:** Participant flow diagram

**Figure S2:** C-indexes and calibration plots

**Table S1:** Hazard ratios of walking pace with all-cause, cancer, and cardiovascular mortality

| Model                               | Category (pace) | Mortality         |                   |                   |
|-------------------------------------|-----------------|-------------------|-------------------|-------------------|
|                                     |                 | All-cause         | Cancer            | Cardiovascular    |
| <b>Women (hazard ratio, 95% CI)</b> |                 |                   |                   |                   |
| Reference                           | Brisk           | 1                 | 1                 | 1                 |
| 1                                   | Average         | 1.22 (1.13, 1.32) | 1.15 (1.05, 1.26) | 1.41 (1.12, 1.76) |
| 1                                   | Slow            | 2.54 (2.28, 2.81) | 1.52 (1.31, 1.76) | 4.19 (3.21, 5.47) |
| 2                                   | Average         | 1.16 (1.08, 1.26) | 1.13 (1.03, 1.24) | 1.28 (1.02, 1.61) |
| 2                                   | Slow            | 1.86 (1.66, 2.09) | 1.32 (1.12, 1.54) | 2.73 (2.04, 3.66) |
| 3                                   | Average         | 1.11 (1.03, 1.20) | 1.08 (0.98, 1.19) | 1.19 (0.95, 1.50) |
| 3                                   | Slow            | 1.64 (1.46, 1.85) | 1.18 (1.00, 1.38) | 2.21 (1.64, 2.97) |
| 4                                   | Average         | 1.10 (1.01, 1.19) | 1.06 (0.96, 1.17) | 1.16 (0.92, 1.47) |
| 4                                   | Slow            | 1.58 (1.39, 1.79) | 1.12 (0.94, 1.34) | 2.00 (1.44, 2.78) |
| 5                                   | Average         | 1.09 (1.01, 1.19) | 1.06 (0.96, 1.18) | 1.16 (0.91, 1.46) |
| 5                                   | Slow            | 1.56 (1.37, 1.77) | 1.12 (0.94, 1.34) | 1.97 (1.41, 2.74) |
| + Excl. first 2 years               | Average         | 1.07 (0.98, 1.16) | 1.04 (0.94, 1.16) | 1.12 (0.86, 1.45) |
| + Excl. first 2 years               | Slow            | 1.45 (1.27, 1.67) | 1.03 (0.85, 1.24) | 1.95 (1.35, 2.81) |
| <b>Men (hazard ratio, 95% CI)</b>   |                 |                   |                   |                   |
| Reference                           | Brisk           | 1                 | 1                 | 1                 |
| 1                                   | Average         | 1.39 (1.30, 1.48) | 1.24 (1.14, 1.34) | 1.63 (1.41, 1.87) |
| 1                                   | Slow            | 3.23 (2.96, 3.52) | 1.77 (1.55, 2.03) | 4.83 (4.06, 5.73) |
| 2                                   | Average         | 1.29 (1.21, 1.37) | 1.19 (1.10, 1.30) | 1.45 (1.26, 1.67) |
| 2                                   | Slow            | 2.06 (1.87, 2.27) | 1.45 (1.25, 1.68) | 2.52 (2.08, 3.07) |
| 3                                   | Average         | 1.21 (1.13, 1.29) | 1.10 (1.01, 1.20) | 1.35 (1.17, 1.56) |
| 3                                   | Slow            | 1.79 (1.63, 1.97) | 1.24 (1.07, 1.43) | 2.19 (1.80, 2.67) |
| 4                                   | Average         | 1.18 (1.11, 1.26) | 1.07 (0.98, 1.17) | 1.29 (1.12, 1.49) |
| 4                                   | Slow            | 1.67 (1.51, 1.85) | 1.13 (0.97, 1.32) | 1.94 (1.58, 2.39) |
| 5                                   | Average         | 1.17 (1.10, 1.25) | 1.07 (0.98, 1.17) | 1.27 (1.10, 1.47) |
| 5                                   | Slow            | 1.63 (1.47, 1.81) | 1.13 (0.97, 1.33) | 1.87 (1.52, 2.30) |
| + Excl. first 2 years               | Average         | 1.13 (1.05, 1.21) | 1.05 (0.96, 1.16) | 1.19 (1.01, 1.39) |
| + Excl. first 2 years               | Slow            | 1.55 (1.38, 1.73) | 1.06 (0.90, 1.26) | 1.75 (1.39, 2.20) |

**Table S2:** Hazard ratios of handgrip strength with all-cause, cancer, and cardiovascular mortality

| Model                               | Category (tertile) | Mortality         |                   |                   |
|-------------------------------------|--------------------|-------------------|-------------------|-------------------|
|                                     |                    | All-cause         | Cancer            | Cardiovascular    |
| <b>Women (hazard ratio, 95% CI)</b> |                    |                   |                   |                   |
| Reference                           | Top                | 1                 | 1                 | 1                 |
| 1                                   | Middle             | 1.11 (1.01, 1.22) | 1.02 (0.90, 1.14) | 1.04 (0.79, 1.36) |
| 1                                   | Bottom             | 1.30 (1.19, 1.42) | 1.06 (0.95, 1.18) | 1.42 (1.11, 1.81) |
| 2                                   | Middle             | 1.08 (0.98, 1.19) | 1.00 (0.89, 1.13) | 0.99 (0.76, 1.30) |
| 2                                   | Bottom             | 1.17 (1.07, 1.28) | 1.01 (0.91, 1.13) | 1.20 (0.94, 1.54) |
| 3                                   | Middle             | 1.07 (0.98, 1.18) | 1.00 (0.90, 1.13) | 0.98 (0.75, 1.28) |
| 3                                   | Bottom             | 1.16 (1.05, 1.27) | 1.01 (0.90, 1.13) | 1.15 (0.90, 1.48) |
| 4                                   | Middle             | 1.07 (0.97, 1.18) | 1.00 (0.89, 1.13) | 0.98 (0.75, 1.28) |
| 4                                   | Bottom             | 1.13 (1.04, 1.24) | 1.01 (0.90, 1.13) | 1.13 (0.88, 1.45) |
| 5                                   | Middle             | 1.06 (0.96, 1.17) | 1.00 (0.89, 1.12) | 0.96 (0.73, 1.26) |
| 5                                   | Bottom             | 1.10 (1.00, 1.21) | 1.00 (0.89, 1.12) | 1.07 (0.83, 1.37) |
| + Excl. first 2 years               | Middle             | 1.05 (0.95, 1.16) | 1.01 (0.90, 1.15) | 0.91 (0.68, 1.23) |
| + Excl. first 2 years               | Bottom             | 1.08 (0.98, 1.20) | 1.01 (0.89, 1.13) | 1.01 (0.77, 1.34) |
| <b>Men (hazard ratio, 95% CI)</b>   |                    |                   |                   |                   |
| Reference                           | Top                | 1                 | 1                 | 1                 |
| 1                                   | Middle             | 1.07 (0.99, 1.15) | 0.91 (0.83, 1.01) | 1.31 (1.11, 1.55) |
| 1                                   | Bottom             | 1.42 (1.33, 1.53) | 1.03 (0.94, 1.14) | 1.81 (1.55, 2.11) |
| 2                                   | Middle             | 1.01 (0.94, 1.09) | 0.89 (0.81, 0.99) | 1.22 (1.03, 1.44) |
| 2                                   | Bottom             | 1.22 (1.14, 1.31) | 0.97 (0.88, 1.07) | 1.44 (1.23, 1.69) |
| 3                                   | Middle             | 1.00 (0.93, 1.08) | 0.89 (0.80, 0.98) | 1.21 (1.02, 1.43) |
| 3                                   | Bottom             | 1.21 (1.12, 1.30) | 0.96 (0.87, 1.06) | 1.43 (1.22, 1.67) |
| 4                                   | Middle             | 1.00 (0.93, 1.08) | 0.89 (0.80, 0.99) | 1.22 (1.04, 1.45) |
| 4                                   | Bottom             | 1.19 (1.11, 1.28) | 0.95 (0.87, 1.05) | 1.44 (1.23, 1.68) |
| 5                                   | Middle             | 1.00 (0.92, 1.07) | 0.89 (0.80, 0.98) | 1.21 (1.03, 1.43) |
| 5                                   | Bottom             | 1.16 (1.08, 1.25) | 0.95 (0.86, 1.04) | 1.38 (1.18, 1.62) |
| + Excl. first 2 years               | Middle             | 0.96 (0.89, 1.05) | 0.88 (0.79, 0.98) | 1.16 (0.97, 1.40) |
| + Excl. first 2 years               | Bottom             | 1.08 (1.00, 1.17) | 0.89 (0.81, 0.99) | 1.31 (1.10, 1.56) |

**Figure S1:** Participant flow diagram

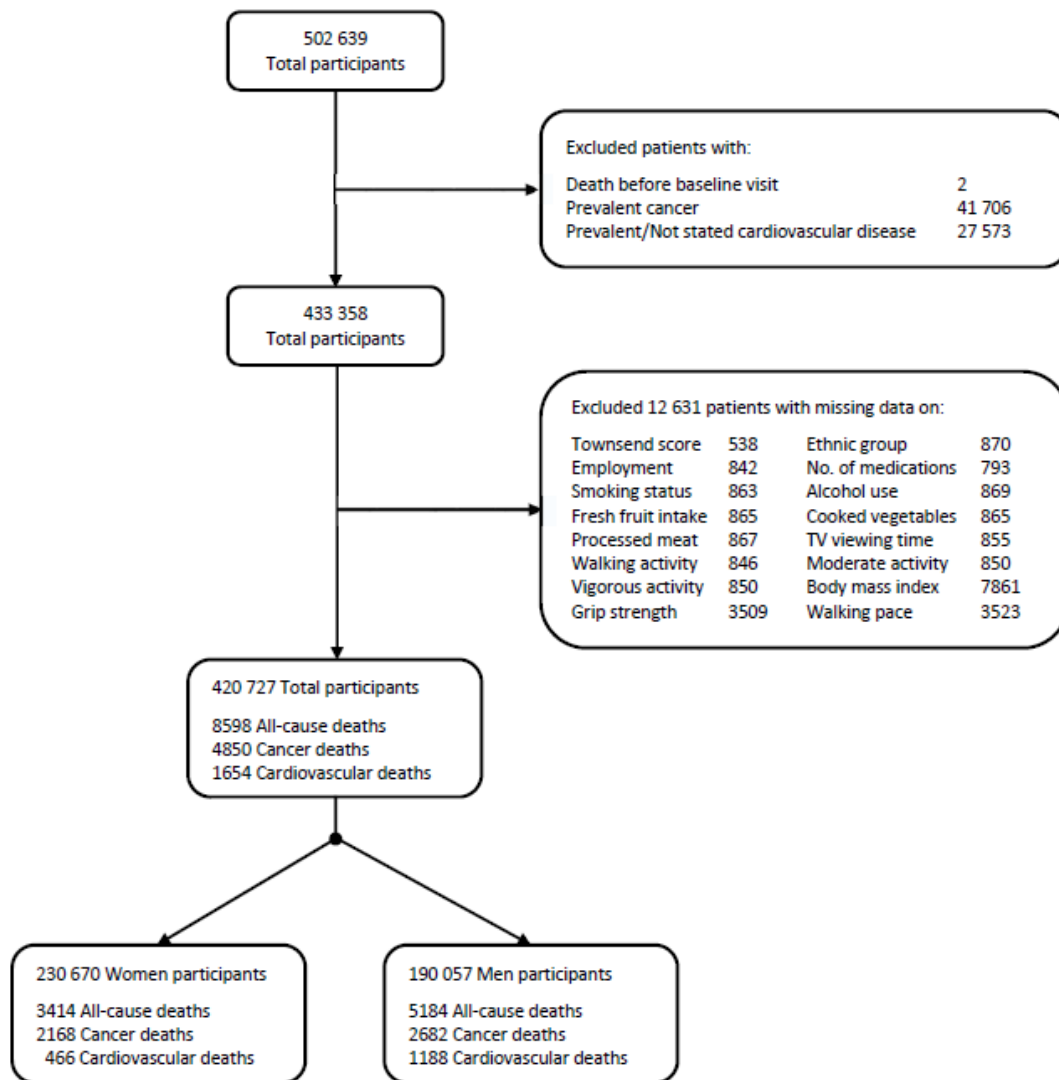

**Figure S2: C-indexes and calibration plots**

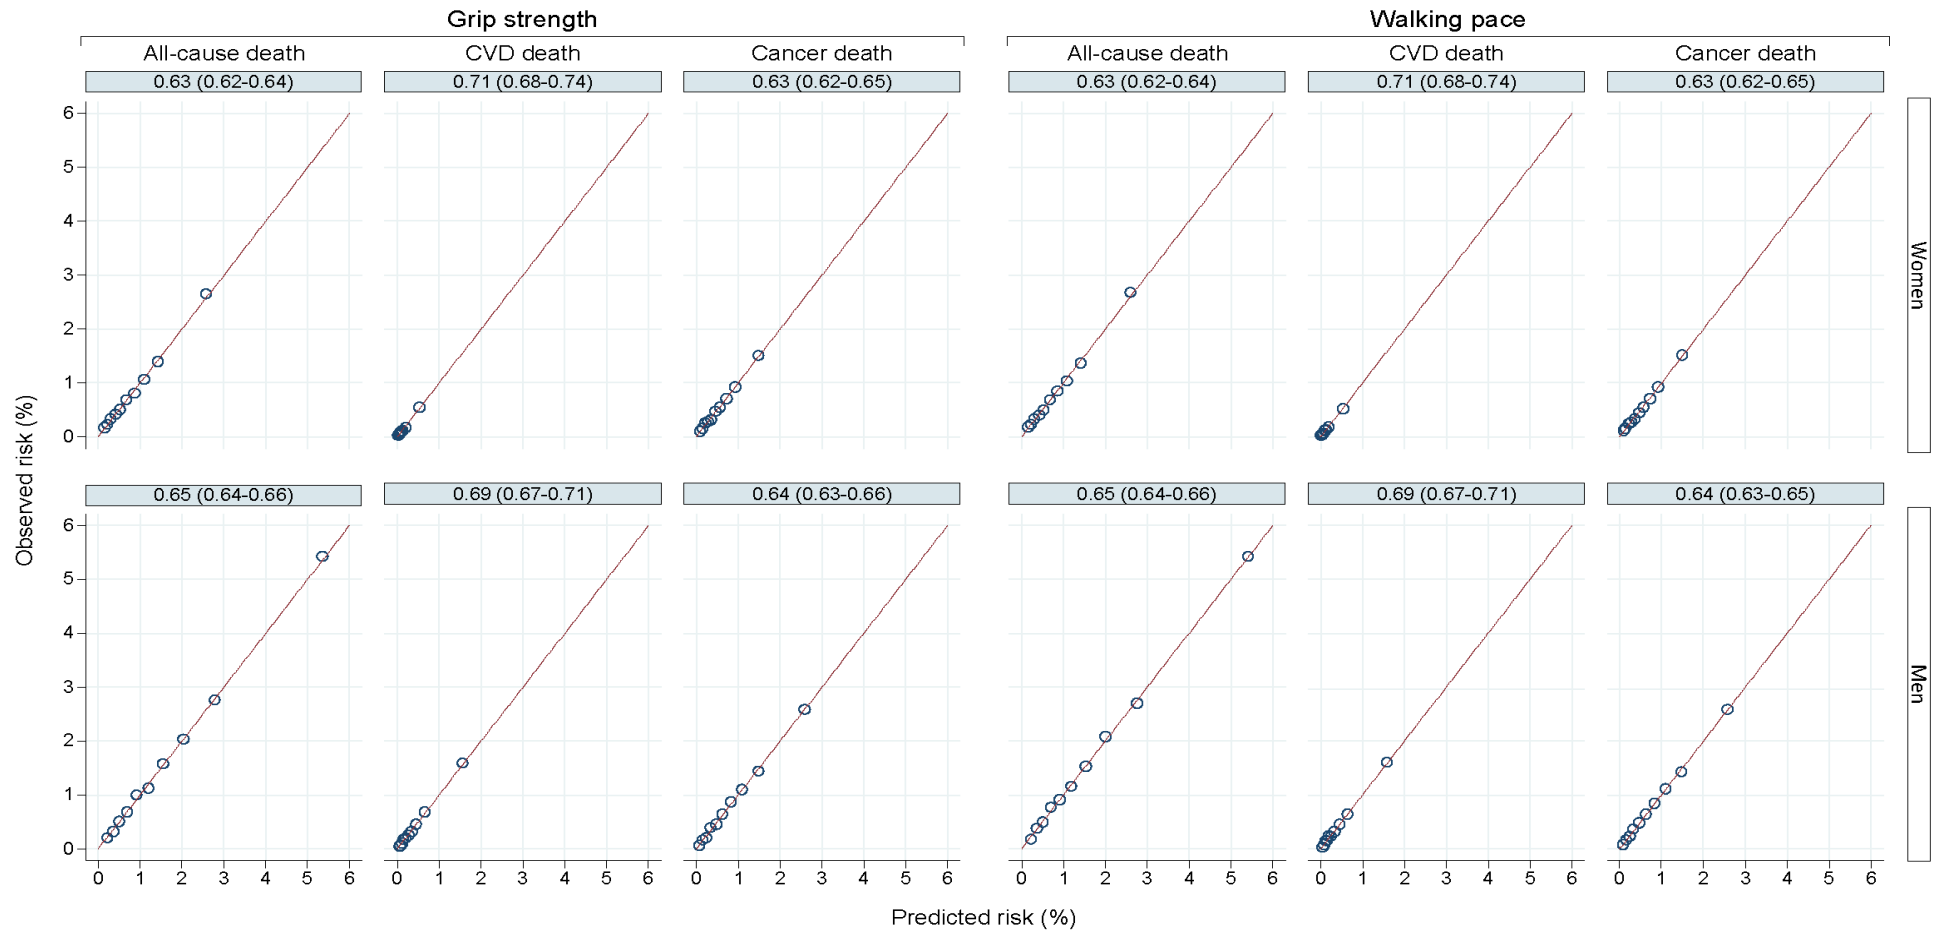

Calibration plots and C-index (95% CI) of models including covariates of model 4 plus grip strength (left) or walking pace (right), by outcome at 5 years and sex.
